# Supplementary material
Source: PubMed Central journal article supplement (PMC8081759)
Supplement: NIHMS1663312-supplement-Table_4.pdf [file NIHMS1663312-supplement-Table_4.pdf]

## Appendix Supplementary Materials

**Table 4. Unadjusted odds ratios with 95% confidence intervals (95% CI) and *p* values for factors longitudinally correlated with recent unintentional non-fatal overdose among marginalised women in B.C., Canada, [2010-2018] (*N* = 696)**

| Characteristic                                                                       | Odds Ratio<br>(95% CI) | <i>p</i> value |
|--------------------------------------------------------------------------------------|------------------------|----------------|
| <b>Child apprehended</b><br>(yes vs. no)                                             | 1.82 (1.24 – 2.67)     | 0.002          |
| <b>Indigenous</b><br>(yes vs. no)                                                    | 1.69 (1.15 – 2.49)     | 0.008          |
| <b>Ever homeless</b><br>(yes vs. no)                                                 | 4.94 (2.33 - 10.48)    | <0.001         |
| <b>Recently homeless†</b><br>(yes vs. no)                                            | 1.60 (1.11 – 2.30)     | 0.012          |
| <b>Sex work†</b><br>(yes vs. no)                                                     | 1.33 (0.92 – 1.91)     | 0.134          |
| <b>Lifetime sexual or<br/>physical intimate partner<br/>violence</b><br>(yes vs. no) | 2.16 (1.20 – 3.88)     | 0.010          |
| <b>Ever removed from<br/>parents</b><br>(yes vs. no)                                 | 2.25 (1.51 – 3.34)     | <0.001         |
| <b>Age</b><br>(per year older)                                                       | 1.00 (0.98 – 1.02)     | 0.907          |
| <b>Education (high school)</b><br>(yes vs. no)                                       | 0.63 (0.42 – 0.93)     | 0.020          |
| <b>Food insecurity†</b><br>(yes vs. no)                                              | 1.89 (1.27 – 2.81)     | 0.002          |
| <b>Main source of income†</b><br>(sex work vs. formal<br>employment)                 | 1.45 (0.73 – 2.86)     | 0.286          |
| (no formal employment<br>vs. formal employment)                                      | 1.54 (0.81 – 2.92)     | 0.188          |

†Time updated to capture events in the last 6 months
